# Supplementary material
Source: publisher figshare collection journal article supplement (https://springernature.figshare.com/ndownloader/files/18152375)
Supplement: Supplementary file [file 18152375]

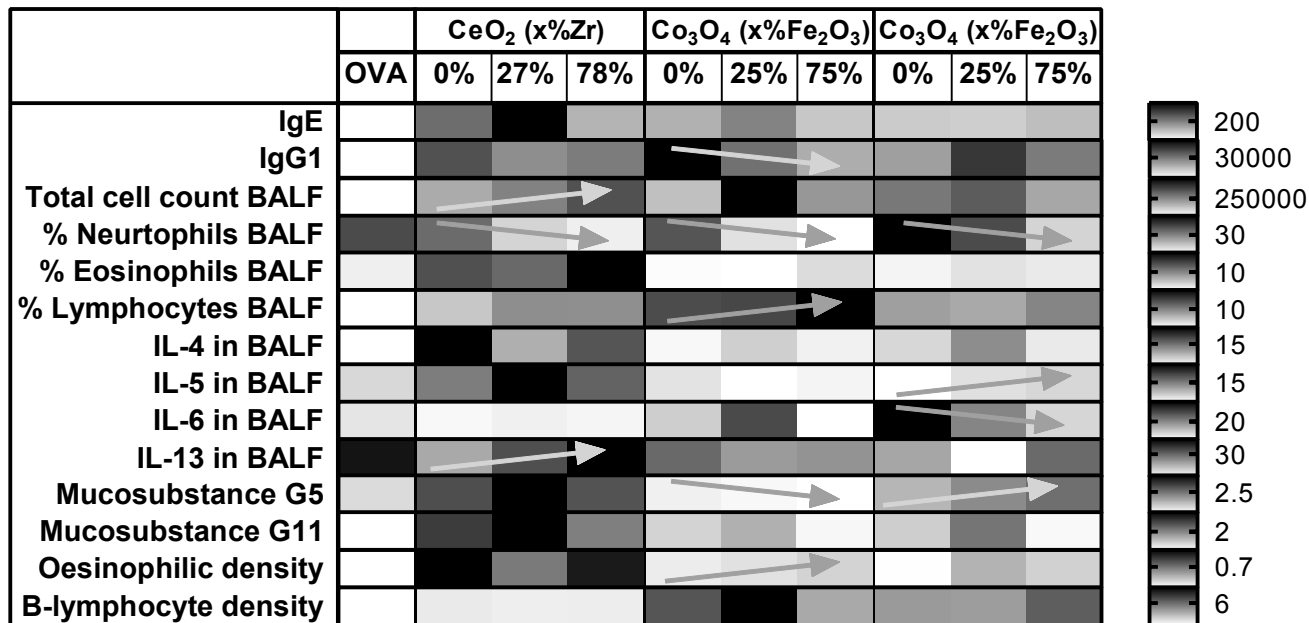

**Figure S1: The influence of the ability of NPs to induce superoxide generation as measured in an acellular EPR assay on the different biomarkers of effects.** The shading indicates the lowest (light grey) to highest (dark grey) response of an NP (relative to each other) for each of the biomarkers. The arrows indicate an increase (↗) or decrease (↘) with decreasing amount of superoxide generation.
